# Arp2/3 Complex Activity Enables Nuclear YAP for Naïve Pluripotency of Human Embryonic Stem Cells

Nathaniel P. Meyer<sup>1</sup>, Tania Singh<sup>1</sup>, Matthew L. Kutys<sup>1</sup>, Todd Nystul<sup>2</sup>, and Diane L. Barber<sup>1</sup>

<sup>1</sup> Department of Cell & Tissue Biology, University of California San Francisco, San Francisco, CA, 94143; USA

<sup>2</sup> Departments of Anatomy and OB-GYN/RS, University of California San Francisco, San Francisco, CA, 94143; USA

Corresponding author

Diane L. Barber

Box 0512

513 Parnassus Ave.

San Francisco, CA 94143

diane.barber@ucsf.edu

## Abstract

Despite our current understanding of transcriptional and epigenetic programs regulating transitions of human embryonic stem cells between distinct stages of pluripotency<sup>1,2</sup>, our knowledge of morphological changes in pluripotency states remains limited. We report remodeling of the actin cytoskeleton of human embryonic stem cells (hESCs) as they transition from primed to naïve pluripotency, which includes assembly of a supracellular ring of contractile actin filaments encapsulating colonies of naïve hESCs. Formation of the actin ring requires activity of the Arp2/3 complex, which promotes uniform cell mechanics within naïve colonies. Arp2/3 complex activity is also necessary for effective transition to naïve pluripotency, through regulation of Hippo signaling and translocation of the Hippo pathway effectors YAP and TAZ from the cytosol to the nucleus. In hESCs with inhibited Arp2/3 complex activity, expression of a constitutively active, nuclear-localized YAP-S127A rescues the naïve pluripotent state, including established markers and colony formation. Together our findings on the cell biology of hESCs reveal a new mechanism by which cytoskeletal dynamics can coordinate cell mechanics to change gene expression and facilitate transitions between pluripotency states.

## Main

Clonal human and other primate pluripotent stem cells (PSCs), as conventionally isolated and maintained, exist in a primed state of pluripotency and more closely resemble the post-implantation epiblast<sup>3</sup>. In contrast, clonal mouse embryonic stem cells (mESCs) represent a ground-state of pluripotency and closely recapitulate the naïve blastocyst from which they are isolated<sup>4</sup>. To study the naïve state of clonal human PSCs, culture conditions were developed that dedifferentiate primed human embryonic stem cells (hESCs) to a naïve state of pluripotency<sup>5-8</sup>. These *in vitro* models of naïve pluripotency provided insights on the transcriptomic, epigenetic, and proteomic programs stem cells maintain for a functional naïve pluripotency state<sup>6,9,10</sup>. We have limited understanding, however, of the morphological changes that occur during the transition from primed to naïve states, how these morphological changes are regulated, and the role of cell morphology in state transitions.

Coordinated changes in cell shape are essential for developmental embryogenesis and are largely mediated by the actin cytoskeleton<sup>11</sup>. Pluripotent stem cell fate is intricately regulated by biophysical cues transmitted through the actin cytoskeleton, which control gene expression, proliferation, and differentiation<sup>12</sup>. We thus sought to characterize the morphology of naïve and primed hESCs. For morphological analysis of pluripotency states, HUES8 primed hESCs were grown on Matrigel and dedifferentiated to naïve pluripotency using previously reported conditions in an mTeSR-based medium supplemented with ERK (PD0325901) and GSK3 (CHIR99021) inhibitors, the adenylyl cyclase activator forskolin, human leukemia inhibitory factor (LIF), basic fibroblast growth factor (bFGF), and ascorbic acid<sup>6,13</sup>. We confirmed transition to a naïve state by showing that colonies have prominent doming by day 6 of dedifferentiation and increased expression of pluripotency markers DNMT3L, DPPA3, KLF2, and KLF4, as determined by rt-PCR (Fig. 1A-B). Staining fixed cells for actin filaments with phalloidin revealed that naïve but not primed colonies had a ring of bundled actin filaments at the colony periphery

(Fig. 1C). These supracellular actin rings similarly formed around colonies of naïve H9 cells and WTC11 iPSCs (Supp. Fig. 1A) as well as HUES8 cells dedifferentiated by alternative medium supplements (Supp. Fig. 1B). Additionally, the actin ring assembled independently of naïve colony size (Supp. Fig. 1C).

A similar actin ring is reported to encircle colonies of clonal human pluripotent stem cells to provide a mechanosensitive element linked to focal adhesions<sup>14</sup>. The actin filament ring we observed around naïve hESC colonies was instead tethered to adherens junctions, as indicated by co-labeling for  $\beta$ -catenin, with separated interdigitated adherens junctions suggested mechanical coupling of the actin ring to adherens junctions (Fig. 1D, crosshairs). Immunolabeling phosphorylated myosin light chain (pMLC) revealed that the actin ring was decorated by pMLC, which also appears at cell-cell interfaces in naïve colonies. In contrast, primed hESC colonies had irregular aggregates of pMLC with limited co-localization with actin filaments (Fig. 1E). Immunolabeling with pan-ERM antibodies co-localized with the actin filament ring in naïve cells, and ERM-specific antibodies revealed co-localization of moesin but not ezrin or radixin (Fig. 1F, Supp. Fig. 1D). Together, these data suggested that the actin ring surrounding naïve hESC colonies was a contractile element.

The supracellular nature of the actin ring and differential pMLC labeling between naïve but not primed hESC colonies suggested a potential difference in colony mechanics, which we determined by using traction force microscopy. Consistent with pMLC localization, primed colonies exhibited elevated tractions that were distributed throughout the colony, suggesting a shift from stabilized cell-cell adhesions toward cell-substrate tensional force (Fig. 1G, left). In contrast to primed, naïve colonies exhibited overall low magnitude cell-substrate tractions that were localized to the colony periphery and largely absent from the colony interior (Fig. 1G, right). Along with pMLC localization, these low tractions are consistent with uniform cell-cell adhesion in naïve hESC colonies. Together these data identify a significant reorganization of

the actin cytoskeleton during transition to a naïve state of pluripotency that includes the assembly of a contractile actin ring surrounding naïve cell colonies, coincident with attenuated cell-substrate traction forces and a transition to enhanced cell-cell junction traction force within the colony unit.

The assembly of an actin ring in naïve but not primed hESC colonies led us to ask whether the actin ring has a functional significance in the transition to naïve pluripotency. New actin filaments are predominantly generated by two distinct nucleators, the Arp2/3 complex which generates branched filaments and formins which generate unbranched filaments<sup>15</sup>. We found that the actin ring assembled when naïve cells are generated in the presence of SMIFH2, a broad-spectrum inhibitor of formin activity<sup>16,17</sup> but not CK666, a selective pharmacological inhibitor of Arp2/3 complex activity<sup>18,19</sup> (Fig. 2A). Additionally, CK666 blocked increased expression of markers of naïve pluripotency seen in controls, determined by qPCR of PECAM1, ESRRB, KLF4, and DNMT3L (Fig. 2B). To eliminate the possibility that CK666 treatment led cells to exit pluripotency and differentiate, we immunolabeled for the general pluripotency markers OCT4 and SOX2 and found that CK666 treated cells remained broadly pluripotent (Supp. Fig. 2). To further assess the pluripotent state of cells dedifferentiated in the presence of CK666, we immunolabeled for the primed pluripotent marker SSEA3<sup>20</sup>. In controls, SSEA3 expression significantly decreased with dedifferentiation, as previously reported<sup>21</sup> but not with CK666 (Fig. 2C, D). Additionally, the naïve pluripotency marker KLF4<sup>22</sup> translocated from the cytoplasm to the nucleus with control dedifferentiation but not in the presence of CK666 (Fig. 2C, E). We further tested for a functional naïve pluripotent state by staining for alkaline phosphatase (AKP) and scoring for colony formation, which indicates the capacity for clonogenic expansion and self-renewal<sup>23</sup>. Primed and naïve hESCs were passaged and plated at clonogenic cell numbers and maintained for five days with or without CK666. In controls, colony formation was greater in naïve compared with primed hESC, as previously reported<sup>24</sup>.

However, with CK666, but not CK689, an inactive analog of CK666, there was no increase in colony formation in naïve compared with primed cells (Fig. 2F). Further, in addition to preventing assembly of the actin filament ring, elevated cell-ECM tractions throughout the colony (Fig. 2G) were retained with CK666, abrogating the difference in traction forces previously observed between primed to naïve colonies (Fig. 1H). These data identify an essential role for the Arp2/3 complex in promoting an actin filament ring and uniform naïve colony mechanics as well as acquiring a naïve pluripotent state of hESCs.

To understand how Arp2/3 complex activity affects the transcriptional circuitry required to establish naïve pluripotency, we performed bulk RNA-sequencing on primed cells, naïve cells, and cells dedifferentiated in the presence of CK666 (Fig. 3A). We found that primed, naïve, and CK666-treated cells had a total of 12,817 differentially expressed genes (DEGs) with an adjusted  $pval < 0.05$ . Of these DEGs, 182 were unique to control primed cells compared with control naïve cells and were not differentially expressed in CK666-treated cells; CK666-treated cells compared with control primed or control naïve cells had 102 and 502 DEGs, respectively. To determine the transcriptional networks involved in the dedifferentiation from primed to naïve pluripotency, we identified KEGG pathways in control naïve dedifferentiation that revealed Hippo signaling as the top candidate (Fig. 3B). Additionally, transcription factor binding motif analysis identified TEAD2 as a top candidate, which is a downstream effector of Hippo signaling (Fig. 3C).

The Hippo effector protein YAP is a known regulator of the human naïve pluripotent state, with overexpression of YAP in pluripotent stem cells promoting the acquisition of naïve pluripotency<sup>13</sup>. Although actin filament dynamics, including a contractile ring of actin, regulate YAP signaling<sup>25,26</sup>, to our knowledge a role for Arp2/3 complex activity regulating YAP or TAZ activity in human naïve pluripotency has not been reported. For an unbiased global analysis of known YAP target genes, we used two publicly available datasets<sup>27,28</sup> and found that of the

3,744 YAP target genes identified in our RNAseq dataset, 3156 (84%) were not differentially expressed in any condition and 588 (16%) were enriched in one or multiple conditions. Of those 588 enriched YAP-target genes, 174 (30%) were significantly enriched in the control naïve dedifferentiation condition versus the control primed condition; 407 (69%) were significantly enriched among CK666-treated dedifferentiation condition versus the control primed condition; and 7 (1%) were significantly enriched in both conditions versus the control primed condition (Fig. 3D, adjusted pval >0.05).

Of the genes significantly enriched in the control naïve condition compared with the control primed condition, known naïve pluripotency markers such as OTX2, DLG2, and CRY1 were significantly upregulated; these naïve markers failed to significantly increase in the CK666-treated condition (Fig 3E, left). As expected, genes significantly enriched among both DEG lists include known YAP and Hippo targets such as ANKRD1, SLIT2, and CHD10. (Fig. 3E, right). Genes significantly enriched among the CK666-treated condition include the negative Hippo regulator AMOT<sup>29</sup>, and lineage-commitment genes such as SOX6 and SPEF2 (Fig. 3E, middle). These data suggested a Hippo signaling pathway program, driven by mediators such as YAP, occurs during dedifferentiation to naïve pluripotency but is disrupted by inhibiting Arp2/3-complex activity. To verify this prediction, we immunolabeled cells to determine YAP localization and found increased nuclear/cytoplasmic ratios of YAP (Fig. 3F-G) and TAZ (Supp. Fig. 3) with control dedifferentiation that was blocked by CK666.

Consistent with these data, during preimplantation development, actin filaments and associated proteins generate mechanical forces that contribute to differentiation throughout the blastocyst stage through modulation of mechanosensitive signaling pathways such as Hippo signaling<sup>30,31</sup>. These actin structures allow cells within the developing blastocyst to organize based on contractility, coupling mechanosensing and fate specification<sup>32</sup>. Therefore, we hypothesized that Arp2/3 complex activity facilitated naïve dedifferentiation through increasing

YAP nuclear localization. To test this prediction, we asked whether primed hESCs stably expressing a constitutively active, nuclear-localized form of YAP (YAP-S127A) could restore naïve dedifferentiation in the presence of CK666. Accordingly, we observed that two immunofluorescence-based markers of the naïve state, increased nuclear localization of KLF4 (Fig. 4A-B) and decreased SSEA3 (Fig. 4C-D), were rescued by overexpression YAP-S127A in the presence of CK666. In contrast, acquisition of a naïve state of pluripotency remained blocked with CK666 treatment in cells overexpressing wildtype YAP (WT YAP) (Fig. 4A-D). Additionally, YAP-S127A rescued colony formation, a functional form of naïve pluripotency, that was inhibited with CK666 (Fig. 4E).

Together, our data support a model in which naïve pluripotency is characterized by an Arp2/3 complex-dependent remodeling of the actin cytoskeleton that includes formation of a contractile supracellular actin ring enclosing naïve colonies and establishment of uniformity in colony mechanics likely enabled by the actin ring being physically associated with  $\beta$ -catenin, and moesin, which are known to play roles in pluripotency<sup>33,34</sup> (Fig. 4F). Moreover, Arp2/3 activity facilitates dedifferentiation to a naïve state of pluripotency through promoting nuclear translocation of YAP and regulating Hippo target gene expression. Consistent with these findings, naïve pluripotency that is blocked with inhibited Arp2/3 complex activity is restored by expressing a constitutively active, nuclear-localized YAP-S127A.

Our findings are distinct from those on a contractile actin filament ring that assembles around colonies of primed pluripotent stem cells<sup>14</sup> and *Xenopus* neural crest cells<sup>35</sup>, which functions to enhance cell-substrate adhesion and migratory capacity, respectively. Our findings also highlight distinct differences between murine and human embryonic stem cells. Cells within the ICM of mouse blastocysts exclude YAP from the nucleus whereas cells within the ICM of human blastocysts maintain nuclear YAP<sup>13,36</sup>. This difference in YAP localization is retained *in vitro*, with murine naïve PSCs retaining YAP within the cytosol<sup>37</sup>, and human naïve PSCs

strongly localizing YAP to the nucleus (Fig. 3F-G). How this difference in YAP localization occurs between mouse and human is unknown, although a number of cytoskeletal factors regulate YAP localization, including stability of the actin cytoskeleton, contractility, and mechanical regulators such as ERM proteins<sup>26</sup>. Further highlighting differences between human and mouse ESCs, we recently reported that Arp2/3 complex activity is necessary for the differentiation of clonal mouse naïve ESCs to the primed epiblast state, which is in part mediated by translocation of myocardin-related transcription factor MRTF from the cytosol to the nucleus<sup>38</sup>. Additionally, a recent report suggests that Arp2/3 complex activity may form a positive feedback loop with YAP-TEAD1 transcriptional activity controlling cytoskeletal reorganization<sup>39</sup>; thus Arp2/3 complex activity may regulate naïve pluripotency at multiple stages including initially to reorganize the actin cytoskeleton, but also during maintenance of naïve pluripotency through regulating YAP localization and hence activity.

Our findings increase our understanding of actin dynamics and cell mechanics as regulators of cell fate transitions. A role for contractile actin filaments as a mechanoresponsive element for pluripotency states is well established<sup>40</sup>, and our work identifies cytoskeletal dynamics essential for uniform colony mechanics and the naïve pluripotent state, the role of Arp2/3 complex activity, and YAP/TAZ activity as a promising target for reprogramming of hESCs and for regenerative medicine.

## **METHODS**

### **Cell Culture**

Primed human embryonic stem cell lines HUES8, H9, and WTC11 were maintained on Matrigel (Corning Life Science #354277) in feeder-free mTeSR-1 medium (STEMCELL Technologies # 85850) at 37°C with 5% CO<sub>2</sub> with daily medium changes. Cells were passaged approximately



every 3 days, by dissociating with Accutase (STEMCELL Technologies #07920) and including the Rho-associated coiled-coil kinase (ROCKi) inhibitor Y-276932 (10  $\mu$ M; Selleckchem #S1049) in the plating medium to facilitate survival. All cell lines were routinely confirmed to be negative for mycoplasma by testing with a MycoAlert Mycoplasma Detection Kit (Lonza # LT07-701).

### **Generation of Naïve hESCs**

Dedifferentiation was completed using previously published methods<sup>6,13</sup>. Cells were plated at a density of 10,000 cells per  $\text{cm}^2$  in the presence of ROCKi (10 $\mu$ M). After 24 h, cells were washed 3 times with PBS and incubated in naïve dedifferentiation medium of mTeSR-1 supplemented with 12 ng/mL bFGF (Peprotech #AF-100-18B), 1  $\mu$ M PD0325901 (MEKi, Selleckchem #S1036), 3  $\mu$ M CHIR99021 (GSK3 $\beta$ i, Selleckchem # S2924), 10  $\mu$ M Forskolin (StemCell Technologies #72112), 50 ng/mL ascorbic acid (Sigma # A92902), and 1000 U recombinant human LIF (StemCell Technologies #78055). Medium was replaced daily, and cells were passaged every 3 days with Accutase. Where indicated, the naïve dedifferentiation medium 2iFL was used, which was mTeSR-1 supplemented with 0.5  $\mu$ M PD0325901, 3  $\mu$ M CHIR9902, 10  $\mu$ M Forskolin, and 1000 U recombinant human LIF. For actin nucleator experiments, naïve dedifferentiation media was supplemented with either 80  $\mu$ M CK666 (EMD Millipore #182515), 80  $\mu$ M CK689 (EMD Millipore #182517), or 50  $\mu$ M SMIFH2 (Sigma #S4826).

### **qPCR**

Total RNA was isolated using RNAeasy Mini Plus (Qiagen #74134) kits and cDNA was generated using iScript cDNA Synthesis kits (Bio-Rad #1708890) as per the manufacturer's specifications. Quantitative PCR was performed using iQ SYBR Green Supermix (Bio-Rad #1708882) and analyzed on a QuantStudio six Flex Real-Time PCR System (Applied Biosystems).

| qPCR Primer Name | Sequence (5' to 3')     |
|------------------|-------------------------|
| GAPDH_for        | ACAAC TTTGGTATCGTGGAAGG |
| GAPDH_rev        | GCCATCACGCCACAGTTTC     |
| Oct4_for         | GTGTT CAGCCAAAAGACCATCT |
| Oct4_rev         | GGCCTGCATGAGGGTTTCT     |
| Dnmt3l_for       | TGAACAAGGAAGACCTGGACG   |
| Dnmt3l_rev       | CAGTGCCTGCTCCTTATGGCT   |
| Klf2_for         | ACCAAGAGCTCGCACCTAAA    |
| Klf2_rev         | GTGGCACTGAAAGGGTCTGT    |
| Klf4_for         | CGGACATCAACGACGTGAG     |
| Klf4_rev         | GACGCCTTCAGCACGAACT     |
| DPPA3_for        | TAGCGAATCTGTTTCCCCTCT   |
| DPPA3_rev        | CTGCTGTAAAGCCACTCATCTT  |
| PECAM1_for       | AACAGTGTTGACATGAAGAGCC  |
| PECAM1_rev       | TGTAAAACAGCACGTCATCCTT  |
| ESRRB_for        | ATCAAGTGCGAGTACATGCTC   |
| ESRRB_rev        | CGCCTCCGTTTGGTGATCTC    |

## Staining and Immunolabeling

For microscopy, cells were plated on Matrigel-coated glass coverslips prepared using an ultrasonic cleaning bath (Branson). In brief, coverslips were sonicated for 20 minutes in the presence of diluted Versa-Clear (FisherScientific #18-200-700) in double distilled H<sub>2</sub>O (ddH<sub>2</sub>O), washed three times using ddH<sub>2</sub>O, sonicated for 20 minutes in ddH<sub>2</sub>O, washed three times using ddH<sub>2</sub>O, and sterilized and stored in 70% ethanol. Cells were maintained for indicated times, typically 3 days, washed briefly with PBS, fixed with 4% PFA for 12 minutes at room temperature, permeabilized with 0.1% Triton X-100 in PBS for 5 minutes, and incubated with

blocking buffer consisting of 0.1% Triton X-100 in PBS and 1% BSA for 1 h. Cells were then incubated with primary antibodies diluted in blocking buffer overnight at 4°C, washed with PBS three times, and incubated for 1 hour at room temperature with secondary antibodies, followed by a final PBS 3X wash, with the second wash containing Hoechst 33342 (1:10,000; Molecular Probes #H-3570) to stain nuclei. To stain for actin filaments, either rhodamine phalloidin (1:400, Invitrogen # R415) or Phalloidin-iFluor 647 (1:1000, Abcam # ab176759) was added to the secondary antibody incubation.

| <b>Antibody</b>    | <b>Source</b>   | <b>Catalog Number</b> | <b>Dilution</b> |
|--------------------|-----------------|-----------------------|-----------------|
| $\beta$ -catenin   | BD Transduction | #610154               | 1:200 ICC       |
| pMLC (Thr18/Ser19) | Cell Signaling  | #3674                 | 1:200 ICC       |
| pan-ERM            | Cell Signaling  | #3142                 | 1:400 ICC       |
| Moesin             | Cell Signaling  | #3146                 | 1:400 ICC       |
| Ezrin              | Cell Signaling  | #3145                 | 1:400 ICC       |
| SSEA3              | Santa Cruz      | sc-21703              | 1:200 ICC       |
| KLF4               | Cell Signaling  | #4038                 | 1:200 ICC       |
| YAP                | Sigma Aldrich   | HPA038885             | 1:400 ICC       |
| TAZ                | Sigma Aldrich   | HPA039557             | 1:400 ICC       |
| Oct3/4             | Santa Cruz      | sc-5279               | 1:400 ICC       |
| Sox2               | Cell Signaling  | #3579                 | 1:400 ICC       |

### **Confocal and Super-resolution Image Acquisition and Quantification**

Cells were imaged using an inverted microscope system (Nikon Eclipse TE2000 Perfect Focus System; Nikon Instruments) equipped with a spinning-disk confocal scanner unit (CSU10; Yokogawa), a 488-nm solid-state laser (LMM5; Spectral Applied Research), and a multipoint stage (MS-2000; Applied Scientific Instruments). A CoolSnap HQ2 cooled charge-coupled camera (Photometrics) was used to take images with a camera triggered electronic shutter controlled by NIS Elements Imaging Software (Nikon) and a 60X Plan Apochromat TIRF 1.45 NA oil immersion objective. High resolution and super-resolution images were acquired using a Yokogawa CSU-W1/SoRa spinning disk confocal system (Yokogawa) and an ORCA Fusion BT sCMOS camera (Hamamatsu) using 2x2 camera binning. Nuclear-to-cytoplasmic ratios of

immunolabeled proteins and number of puncta per cell were quantified using NIS Elements Imaging Software (Nikon). Briefly, the fluorescence in the nucleus (detected by Hoescht) and in the cytoplasm were manually sampled by selection of regions-of-interest. Three regions-of-interest outside of any cell were used to calculate background fluorescence and was subtracted from both nuclear and cytoplasmic fluorescence values. The ratio of fluorescence was then determined by dividing the nuclear fluorescence intensity with that of the cytoplasm for a given cell. Quantification of puncta for SSEA3 was done by creating a 3D projection of full-cell z-stacks by using NIS Elements Imaging Software. Surfaces were created using the 3D thresholding tool normalized across all images and the total number of puncta was recorded. The total number of cells was then counted, as determined by the number of Hoescht positive nuclei, and the number of puncta per cell was calculated by dividing the total number of puncta by the number of cells in each field of view.

### **Traction Force Microscopy**

Polyacrylamide gels of 7.9 kPa stiffness were made by adjusting acrylamide and bisacrylamide stock solution (Bio-Rad Laboratories, Hercules, CA) concentrations. A solution of 40% acrylamide, 2% bisacrylamide and 1xPBS was polymerized by adding tetramethylethylene diamine (Fisher BioReagents) and 1% ammonium persulfate. A droplet of the gel solution supplemented with 0.2  $\mu\text{m}$  fluorescent beads solution (Molecular Probe, Fisher Scientific) was deposited on a quartz slide (Fisher Scientific) and covered with a 25-mm glass (Fisher) coverslip pretreated with 3-aminopropyltrimethoxysilane (Sigma-Aldrich) and glutaraldehyde (Sigma-Aldrich). After polymerization, the gel surface attached to the quartz slide was functionalized with Matrigel via polydopamine. The gel was sterilized and stored in 1X PBS before cell seeding. The traction forces exerted by colonies on the polyacrylamide gel substrates were computed by measuring the displacement of fluorescent beads embedded within the gel. Briefly, images of bead motion near the substrate surface, distributed in and

around the contact region of a single cell (before and after cell detachment with 10% sodium dodecyl sulfate), were acquired with Yokogawa CSU-21/Zeiss Axiovert 200M inverted spinning disk microscope with a Zeiss LD C-Apochromat 40X, 1.1 NA water-immersion objective and an Evolve EMCCD camera (Photometrics). The traction stress vector fields were generated using an open-source package of FIJI plugins (<https://sites.google.com/site/qingzongtseng/tfm>).

### **Colony Formation Assay**

To determine clonogenic potential, cells were dissociated with Accutase and plated on Matrigel-coated 6-well dishes at a density of 1,000 cells per cm<sup>2</sup> in the presence of ROCKi (10 μM). Five days after plating, cells were stained for alkaline phosphatase as per the manufacturer's protocol (StemAb Alkaline Phosphatase Staining Kit II, ReproCell #00-0055) and imaged using a Leica DFC 7000t microscope. To quantify the number of alkaline phosphatase positive colonies, images were analyzed using Fiji<sup>41</sup>.

### **Library Preparation and RNA Sequencing**

RNA was extracted using RNeasy Mini kits (Qiagen) according to the manufacturer's instructions and concentrations were determined by NanoDrop. Library preparation and RNA sequencing were performed by Novogene Co. Ltd (USA). Briefly, RNA purity was measured using a NanoPhotometer spectrophotometer (IMPLEN). RNA integrity and quantity were determined using a Bioanalyzer 2100 system (Agilent Technologies). Three paired biological replicate libraries were prepared for each condition, with each library generated with 1 μg of RNA per sample. Sequencing libraries were generated using NEBNext Ultra RNA Library Prep Kit for Illumina (NEB) following manufacturer's recommendations and index codes were added to attribute sequences to each sample. Briefly, mRNA was purified from total RNA using poly-T oligo-attached magnetic beads. Fragmentation was carried out using divalent cations under elevated temperature in NEBNext First Strand Synthesis Reaction Buffer (5X). First strand

cDNA was synthesized using random hexamer primer and M-MuLV Reverse Transcriptase (RNase H-). Second strand cDNA synthesis was subsequently performed using DNA Polymerase I and RNase H. Remaining overhangs were converted into blunt ends via exonuclease/polymerase activities. After adenylation of 3' ends of DNA fragments, NEBNext Adaptor with hairpin loop structure were ligated to prepare for hybridization. In order to select cDNA fragments of preferentially 150~200 bp in length, the library fragments were purified with AMPure XP system (Beckman Coulter, Beverly, USA). Then 3 µl USER Enzyme (NEB, USA) was used with size-selected, adaptorligated cDNA at 37 °C for 15 min followed by 5 min at 95°C before PCR. Then PCR was performed with Phusion High-Fidelity DNA polymerase, Universal PCR primers and Index (X) Primer. At last, PCR products were purified (AMPure XP system) and library quality was assessed on the Agilent Bioanalyzer 2100 system.

### **RNA Sequencing Analysis**

Raw data (raw reads) were processed through fastp to remove adapters, poly-N sequences, and reads with low quality. Q20, Q30 and GC content of the clean data were calculated and found to be within the normal range. All the downstream analyses were based on the clean data with high quality. Reference genome (ID: 51) and gene model annotation files were downloaded from genome website browser (NCBI) directly. Paired-end clean reads were aligned to the reference genome using the Spliced Transcripts Alignment to a Reference (STAR) software. FeatureCounts was used to count the read numbers mapped of each gene. And then RPKM of each gene was calculated based on the length of the gene and reads count mapped to this gene. Differential expression analysis was performed using DESeq2 R package. The resulting P values were adjusted using the Benjamini and Hochberg's approach for controlling the False Discovery Rate (FDR). Genes with a  $\text{padj} < 0.05$  found by DESeq2 were assigned as differentially expressed. The R package clusterProfiler was used to test the statistical enrichment of differential expression genes in KEGG pathways. KEGG terms with  $\text{padj} < 0.05$

were considered significant enrichment. Transcription factor binding motif analysis was performed using Enrichr<sup>42,43</sup>. To investigate YAP target gene expression, supplementary tables generated as previously described (Pagliari et al., 2020 and Estarás et al. 2017, see Supplemental Methods) were used to generate YAP target gene lists<sup>27,28</sup>.

### **Plasmids, Site-Directed Mutagenesis, and Generation of Lentivirus**

pGAMA-YAP was a gift from Miguel Ramalho-Santos (Addgene plasmid #74942). Site-directed mutagenesis was performed on the pGAMA-YAP construct to create p-GAMA-YAP-S127A using the QuikChange Lightning kit (Agilent Technologies #210513). Forward primers used for the Ser-to-Ala substitution was as follows: 5'-GTTCGAGCTCATGCCTCTCCAGC-3' and 5'-GCTGGAGAGGCATGAGCTCGAAC-3'. The pGAMA-YAP-S127A plasmid was confirmed via DNA sequencing. To prepare lentivirus, HEK293-FT (Invitrogen # R70007) cells were grown in Dulbecco's Modified Eagle Medium (ThermoFisher #11965118) supplemented with 10% fetal bovine serum (Peak Serum #PS-FB4), non-essential amino acids (UCSF CCF #CCFGA001), pen/strep (UCSF CCF #CCFGK003), and sodium pyruvate (UCSF CCF #CCFGE001) and maintained at 37°C with 5% CO<sub>2</sub>. Lentivirus was generated according to the manufacturer's specifications by co-transfecting HEK293-FT's with a mixture of packaging plasmids (ViraPower Lentivirus Expression System; ThermoFisher #K497500). Briefly, 5 x 10<sup>6</sup> HEK293-FT's were seeded onto a 10 cm dish containing 10 mL of complete medium without antibiotics. After 24h, cells were transfected with a mixture of 3 µg of the lentiviral plasmid containing the gene of interest and 9 µg of the ViraPower Packaging Mix using Lipofectamine™ 2000 (ThermoFisher # 11668030). At 72 hours post-transfection, supernatant was collected, filtered, and concentrated using Lenti-X Concentrator (Takarabio #631231). Concentrated viral supernatant was aliquoted and stored at -80°C.

To generate hESC lines stably expressing WT-YAP and YAP-S127A, primed HUES8 cells were grown to approximately 60% confluency in one well of a 6-well plate. Medium was

aspirated, washed once with PBS, and cells were then fed with 1mL fresh media containing 2 µg of polybrene (Millipore Sigma #TR-1003-G), and incubated for 15 minutes at 37°C.

Concentrated virus supernatant (100 µL) was added and after 6-8 hours 1 mL of fresh medium was added. After 36 h, viral particles were removed by replacing medium. Three days after virus infection, hESCs were passaged and expanded to three wells in a 6 well-plate. After reaching ~75% confluency, and sorted for high mCherry expression by using a BD FACS Aria3u, with sorted cell maintain with pen/strep for 3 days and then maintained in standard antibiotic-free TESR+ media.

## References

1. Messmer, T. *et al.* Transcriptional Heterogeneity in Naive and Primed Human Pluripotent Stem Cells at Single-Cell Resolution. *Cell Rep* **26**, 815 (2019).
2. Gökbuget, D. & Blelloch, R. Epigenetic control of transcriptional regulation in pluripotency and early differentiation. *Development* **146**, (2019).
3. Nakamura, T. *et al.* A developmental coordinate of pluripotency among mice, monkeys and humans. *Nature* **537**, 57–62 (2016).
4. Nichols, J. & Smith, A. Naive and Primed Pluripotent States. *Cell Stem Cell* **4**, 487–492 (2009).
5. Theunissen, T. W. *et al.* Systematic Identification of Culture Conditions for Induction and Maintenance of Naive Human Pluripotency. *Cell Stem Cell* **15**, 471–487 (2014).
6. Duggal, G. *et al.* Alternative Routes to Induce Naïve Pluripotency in Human Embryonic Stem Cells. *Stem Cells* **33**, 2686–2698 (2015).
7. Takashima, Y. *et al.* Resetting Transcription Factor Control Circuitry toward Ground-State Pluripotency in Human. *Cell* **158**, 1254–1269 (2014).
8. Szczerbinska, I. *et al.* A Chemically Defined Feeder-free System for the Establishment and Maintenance of the Human Naive Pluripotent State. *Stem Cell Reports* **13**, 612–626 (2019).
9. Warriar, S. *et al.* Direct comparison of distinct naive pluripotent states in human embryonic stem cells. *Nat Commun* **8**, 15055 (2017).
10. Theunissen, T. W., Friedli, M., Trono, D., Ecker, J. R. & Jaenisch, R. Molecular Criteria for Defining the Naive Human Pluripotent State. *Cell Stem Cell* **19**, 502–515 (2016).
11. Chalut, K. J. & Paluch, E. K. The Actin Cortex: A Bridge between Cell Shape and Function. *Dev Cell* **38**, 571–573 (2016).



12. Naqvi, S. M. & McNamara, L. M. Stem Cell Mechanobiology and the Role of Biomaterials in Governing Mechanotransduction and Matrix Production for Tissue Regeneration. *Front Bioeng Biotechnol* **8**, 1375 (2020).
13. Qin, H. *et al.* YAP Induces Human Naive Pluripotency. (2016)  
doi:10.1016/j.celrep.2016.02.036.
14. Närvä, E. *et al.* A Strong Contractile Actin Fence and Large Adhesions Direct Human Pluripotent Colony Morphology and Adhesion. *Stem Cell Reports* **9**, 67–76 (2017).
15. Pollard, T. D. Regulation of Actin Filament Assembly by Arp2/3 Complex and Formins. *Annu Rev Biophys Biomol Struct* **36**, 451–477 (2007).
16. Rizvi, S. A. *et al.* Identification and characterization of a small molecule inhibitor of formin-mediated actin assembly. *Chem Biol* **16**, 1158–1168 (2009).
17. Ganguly, A. *et al.* A dynamic formin-dependent deep F-actin network in axons. *J Cell Biol* **210**, 401–417 (2015).
18. Nolen, B. J. *et al.* Characterization of two classes of small molecule inhibitors of Arp2/3 complex. *Nature* **460**, 1031 (2009).
19. Yang, Q., Zhang, X. F., Pollard, T. D. & Forscher, P. Arp2/3 complex–dependent actin networks constrain myosin II function in driving retrograde actin flow. *J Cell Biol* **197**, 939 (2012).
20. Trusler, O., Huang, Z., Goodwin, J. & Laslett, A. L. Cell surface markers for the identification and study of human naive pluripotent stem cells. (2017)  
doi:10.1016/j.scr.2017.11.017.
21. Liu, X. *et al.* Comprehensive characterization of distinct states of human naive pluripotency generated by reprogramming. *Nature Methods* **14**:11 **14**, 1055–1062 (2017).
22. Takashima, Y. *et al.* Resetting transcription factor control circuitry toward ground-state pluripotency in human. *Cell* **158**, 1254–1269 (2014).
23. Rostovskaya, M., Stirparo, G. G. & Smith, A. Capacitation of human naïve pluripotent stem cells for multi-lineage differentiation. *Development (Cambridge)* **146**, (2019).
24. Chen, C. *et al.* Translational and post-translational control of human naïve versus primed pluripotency. *iScience* **25**, (2022).
25. Hsiao, C. *et al.* Human pluripotent stem cell culture density modulates YAP signaling. *Biotechnol J* **11**, 662 (2016).
26. Furukawa, K. T., Yamashita, K., Sakurai, N. & Ohno, S. The Epithelial Circumferential Actin Belt Regulates YAP/TAZ through Nucleocytoplasmic Shuttling of Merlin. *Cell Rep* **20**, 1435–1447 (2017).
27. Estarás, C., Hsu, H. T., Huang, L. & Jones, K. A. YAP repression of the WNT3 gene controls hESC differentiation along the cardiac mesoderm lineage. *Genes Dev* **31**, 2250–2263 (2017).

28. Pagliari, S. *et al.* YAP-TEAD1 control of cytoskeleton dynamics and intracellular tension guides human pluripotent stem cell mesoderm specification. *Cell Death Differ* **28**, 1193–1207 (2021).
29. Zhao, B. *et al.* Angiomotin is a novel Hippo pathway component that inhibits YAP oncoprotein. *Genes Dev* **25**, 51–63 (2011).
30. Hirate, Y. *et al.* Par-aPKC-dependent and -independent mechanisms cooperatively control cell polarity, Hippo signaling, and cell positioning in 16-cell stage mouse embryos. *Dev Growth Differ* **57**, 544–556 (2015).
31. Zenker, J. *et al.* Expanding Actin Rings Zipper the Mouse Embryo for Blastocyst Formation. *Cell* **173**, 776-791.e17 (2018).
32. Maître, J. L. *et al.* Asymmetric division of contractile domains couples cell positioning and fate specification. *Nature* **536**, 344–348 (2016).
33. Xu, Z. *et al.* Wnt/ $\beta$ -catenin signaling promotes self-renewal and inhibits the primed state transition in naïve human embryonic stem cells. *Proc Natl Acad Sci U S A* **113**, E6382–E6390 (2016).
34. de Belly, H. *et al.* Membrane Tension Gates ERK-Mediated Regulation of Pluripotent Cell Fate. *Cell Stem Cell* **28**, 273 (2021).
35. Shellard, A., Szabó, A., Trepát, X. & Mayor, R. Supracellular contraction at the rear of neural crest cell groups drives collective chemotaxis. *Science* **362**, 339–343 (2018).
36. Nishioka, N. *et al.* The Hippo Signaling Pathway Components Lats and Yap Pattern Tead4 Activity to Distinguish Mouse Trophectoderm from Inner Cell Mass. *Dev Cell* **16**, 398–410 (2009).
37. Chung, H. *et al.* Yap1 is dispensable for self-renewal but required for proper differentiation of mouse embryonic stem (ES) cells. *EMBO Rep* **17**, 519–529 (2016).
38. Aloisio, F. M. & Barber, D. L. Arp2/3 complex activity is necessary for mouse ESC differentiation, times formative pluripotency, and enables lineage specification. *Stem Cell Reports* **17**, 1318–1333 (2022).
39. Pagliari, S. *et al.* YAP–TEAD1 control of cytoskeleton dynamics and intracellular tension guides human pluripotent stem cell mesoderm specification. *Cell Death & Differentiation* **28**, 1193–1207 (2020).
40. de Belly, H., Paluch, E. K. & Chalut, K. J. Interplay between mechanics and signalling in regulating cell fate. *Nature Reviews Molecular Cell Biology* **23**, 465–480 (2022).
41. Schindelin, J. *et al.* Fiji: an open-source platform for biological-image analysis. *Nature Methods* **9**, 676–682 (2012).
42. Chen, E. Y. *et al.* Enrichr: Interactive and collaborative HTML5 gene list enrichment analysis tool. *BMC Bioinformatics* **14**, 1–14 (2013).

43. Kuleshov, M. v. *et al.* Enrichr: a comprehensive gene set enrichment analysis web server 2016 update. *Nucleic Acids Res* **44**, W90–W97 (2016).

## Figure Legends

### **Figure 1. Dedifferentiation of primed hESCs to naïve pluripotency includes F-actin filament remodeling and the formation of an actin ring.**

**a**, Schematic of the dedifferentiation process from primed to naïve human embryonic stem cells (hESCs). **b**, Confirmation of dedifferentiation indicated by increased expression of pluripotency genes associated with a naïve state as determined by qPCR. Data represent the means  $\pm$  S.E.M. normalized to Oct4 ( $n=3$ ). *P* values were calculated using a two-tailed Student's *t*-test. **c-g** Images of primed and naïve stem cells stained or immunolabeled for actin cytoskeleton components. **c**, Confocal (left and middle) and super-resolution (right) images of hESCs stained for F-actin with phalloidin (white) and Hoechst (blue) show a bundled actin filament ring encapsulating colonies of naïve but not primed cells. **d-f**, Confocal images of naïve hESCs immunolabeled for  $\beta$ -catenin (**d**), pMLC (**e**), and ERM proteins (**f**) and stained for F-actin with phalloidin (magenta) demonstrating cytoskeletal remodeling. Scale bars, 25  $\mu$ M. **g**, Representative stress maps generated by traction force microscopy (TFM). Dotted outlines indicate colony borders. Scale bar, 50  $\mu$ M.

### **Figure 2. Inhibiting Arp2/3 complex but not formin activity blocks formation of an actin ring and naïve dedifferentiation.**

**a**, Confocal images of D6 naïve hESCs maintained in the absence (control) or presence of 80  $\mu$ M CK666 or 50  $\mu$ M SMIFH2 and stained for F-actin with phalloidin and nuclei with Hoechst. **b**, Expression of the indicated pluripotency transcripts determined by qPCR at D6 of dedifferentiation in the absence (Control) or presence of CK666 or SMIFH2. The Arp2/3-complex activity inhibitor CK666 impairs upregulation of pluripotency genes used to identify

naïve pluripotency. Data are the means  $\pm$  S.E.M. of 3 determinations normalized to Oct4. *P* values were calculated using a two-tailed Student's *t*-test. **c-e**, Confocal images of control primed and naïve hESCs and D6 cells dedifferentiated in the presence of CK666 immunolabeled for the primed marker SSEA3, quantified in **(d)** and the naïve marker KLF4, quantified in **(e)**. Box plots in **(d)** and **(e)** show median, first and third quartile, with whiskers extending to observations within 1.5 times the interquartile range. **f**, Clonogenicity, determined by alkaline phosphatase positive colonies (quantified in top panel and representative brightfield images in bottom panel) in control primed and naïve hESC as well as dedifferentiated in the presence of CK666 or 80  $\mu$ M CK689, an inactive analog of CK666. Data are the means  $\pm$  S.E.M. normalized to the number of cells plated in 3 separate determinations. Box plots are as described in **(d,e)** with *P* values calculated using a two-tailed Student's *t*-test. Scale bars, 25  $\mu$ M. **g**, Representative stress maps generated by traction force microscopy (TFM). Dotted outlines indicate colony borders. Scale bar, 50  $\mu$ M.

### **Figure 3. Inhibiting Arp2/3 complex activity disrupts Hippo signaling in naïve hESCs.**

**a**, Volcano plots showing transcriptome fold-changes (*padj*) of dedifferentiations in the absence (Control Naïve) or presence of CK666-treated dedifferentiations compared with primed hESCs. Each dot represents a single gene, with significant genes (*padj* < 0.05) in green). Notable primed and naïve markers are depicted in red and blue, respectively. **b,c** KEGG pathway analysis **(b)** and transcription factor enrichment analysis **(c)** of control primed and naïve hESCs. The number of DEGs indicated in each pathway is displayed and asterisks indicate significantly enriched pathways (*p* < 0.05). **d**, Unbiased screening of all known YAP target genes in dedifferentiated cells in the absence (Control Naïve) and presence of CK666. Affected genes were further analyzed to indicate whether they are enriched in control, CK666-treated, or both conditions when compared with primed controls. **e**, Expression of selected YAP target genes from bulk RNAseq, with asterisks indicating significant difference (*padj* < 0.05). **f**,

Representative confocal images of control primed and naïve hESCs and naïve hESCs generated in the presence of 80  $\mu$ M CK666 immunolabeled for YAP and stained for nuclei with Hoechst and F-actin with phalloidin. **g**, Quantification of nuclear to cytoplasmic ratio of YAP from images as shown in **(f)**. Box plots show median, first and third quartile, with whiskers extending to observations within 1.5 times the interquartile range. Data are from 5 separate cell preparations with *P* values calculated using a two-tailed Student's *t*-test. Scale bars, 25  $\mu$ M.

**Figure 4. Overexpression of YAP-S127A rescues naïve pluripotency blocked with inhibiting Arp2/3 complex activity.**

**a, c**, Representative confocal images of control primed, control naïve cells, and cells dedifferentiated in the presence of CK666 with or without stably overexpressing YAP WT or YAP-S127A immunolabeled for the primed marker SSEA3 (**a**) or the naïve marker KLF4 (**c**) and stained for nuclei with Hoechst and F-actin with phalloidin. **b, d**, Images as in **a** and **c** were used to quantify, respectively, the number of SSEA3 puncta (**b**) and the nuclear to cytoplasmic ratio of KLF4 (**d**). Box are plots as described for Figure 2. **e**, Clonogenicity, determined by alkaline phosphatase positive colonies (quantified in top panel and representative brightfield images in bottom panel) in control primed and naïve hESC, and dedifferentiated in the presence of CK666 with stably expressed YAP WT or YAP-S127A. Data are the means  $\pm$  S.E.M. normalized to the number of cells plated from 3 separate determinations, with box plots as described for Figure 2 **d, e** and *P* values are calculated using a two-tailed Student's *t*-test. Scale bars, 25  $\mu$ M. **f**, Model illustrating cytoskeletal remodeling that occurs during dedifferentiation to a naïve state of pluripotency. Successful dedifferentiation to naïve pluripotency includes the formation of an actin ring structure, uniformity of colony mechanics, recruitment of actin-binding proteins known to play roles in pluripotency, and the regulation of Hippo signaling.

**Supplemental Figure 1. a**, Confocal images of naïve H9 hESCs and WTC11 iPSCs stained for F-actin with phalloidin. **b**, Confocal images of naïve hESCs using an alternative dedifferentiation

medium<sup>13</sup>. **c**, Confocal images of naïve hESCs at different colony sizes. **d**, Confocal images of primed hESCs immunolabeled with pan-ERM antibodies, and stained for F-actin with phalloidin and nuclei with Hoechst. Scale bars, 25  $\mu$ M.

**Supplemental Figure 2. a**, Confocal images of naïve hESCs stained for F-actin with phalloidin (magenta) and Hoechst (blue) and immunolabeled for pluripotency markers Oct4 (green) and Sox2 (yellow). Scale bars, 25  $\mu$ M.

**Supplemental Figure 3. a**, Confocal images of D6 primed and naïve hESCs in the absence (Control) or presence of 80  $\mu$ M CK666 immunolabeled for TAZ (green) and stained for F-actin with phalloidin (magenta) and Hoechst (blue). **b**, Quantification of nuclear to cytoplasmic ratio of TAZ from images shown in **a**. Box plots show median, first and third quartile, with whiskers extending to observations within 1.5 times the interquartile range. Data are from 5 separate cell preparations with *P* values calculated using a two-tailed Student's *t*-test. Scale bars, 25  $\mu$ M.

## Figure 1. Meyer et al.

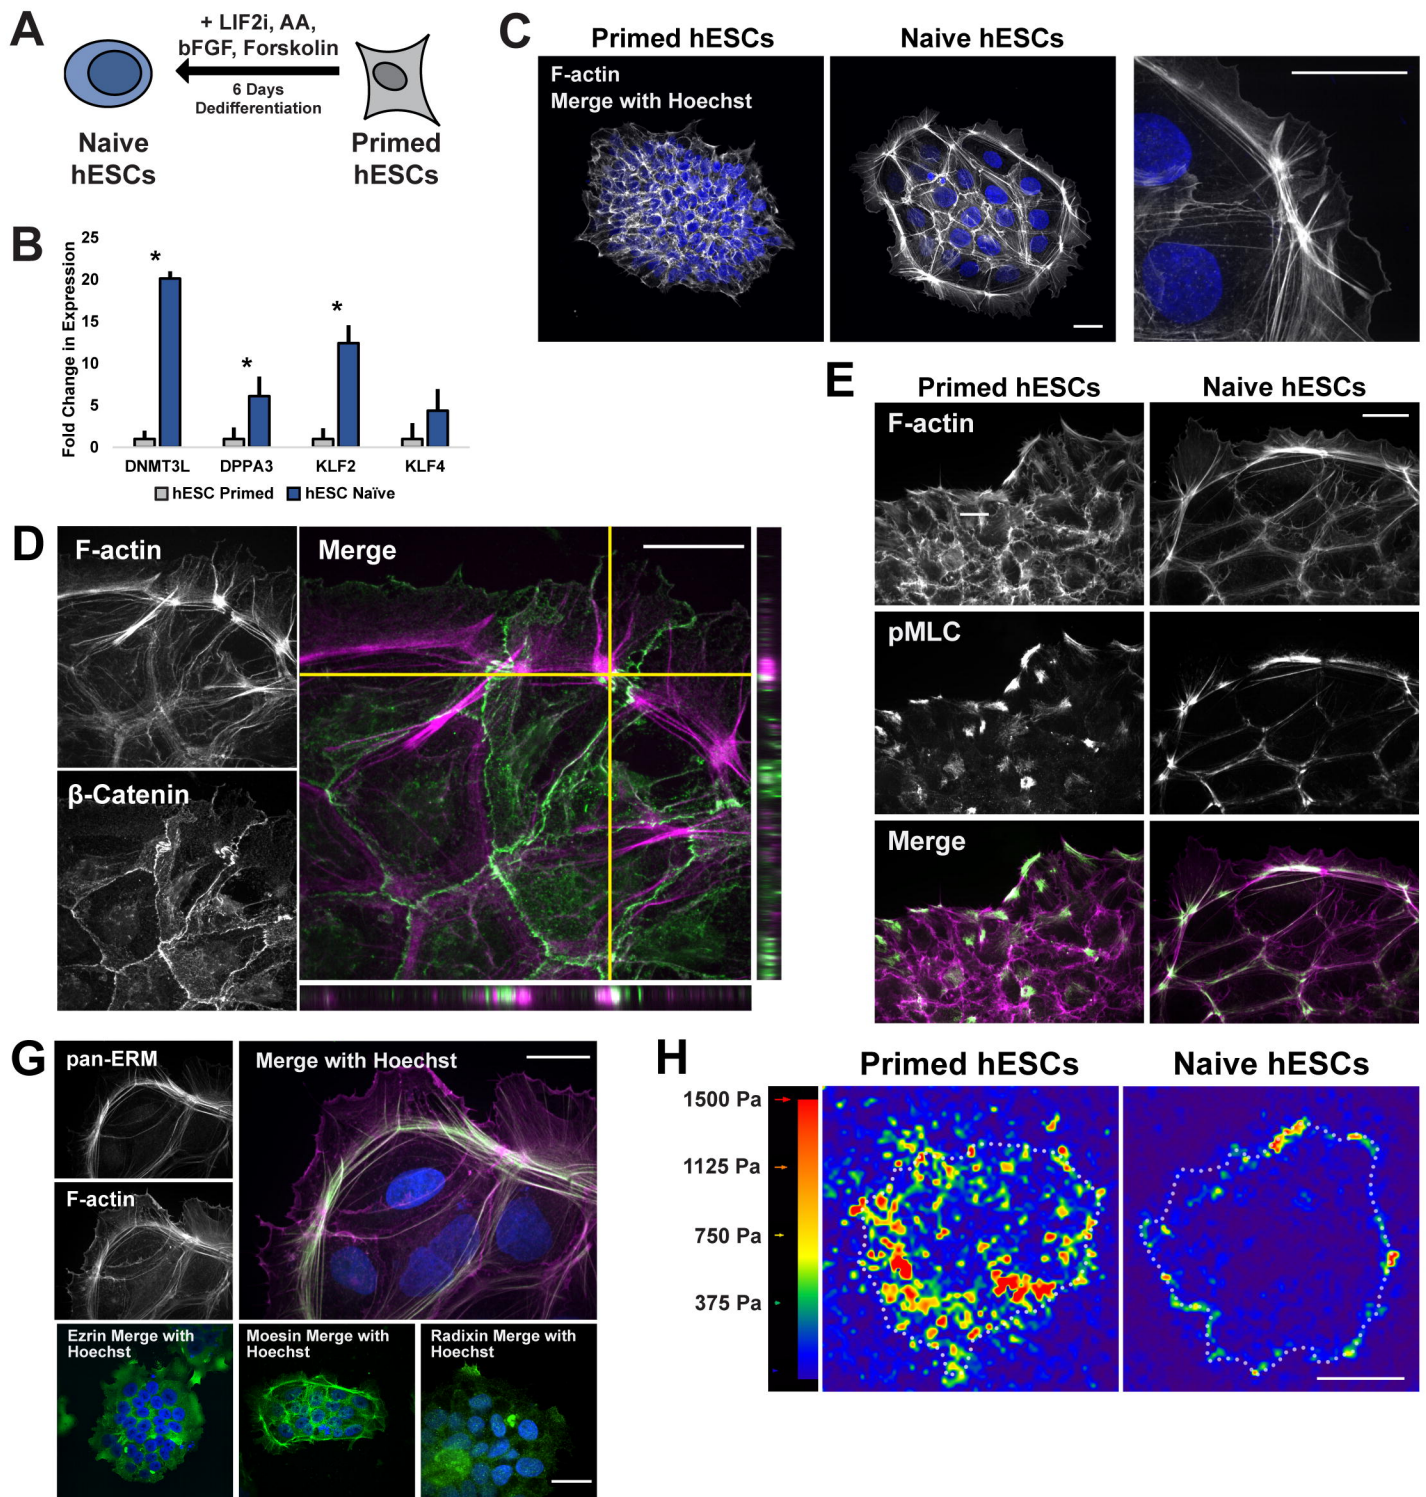

## Figure 2. Meyer et al.

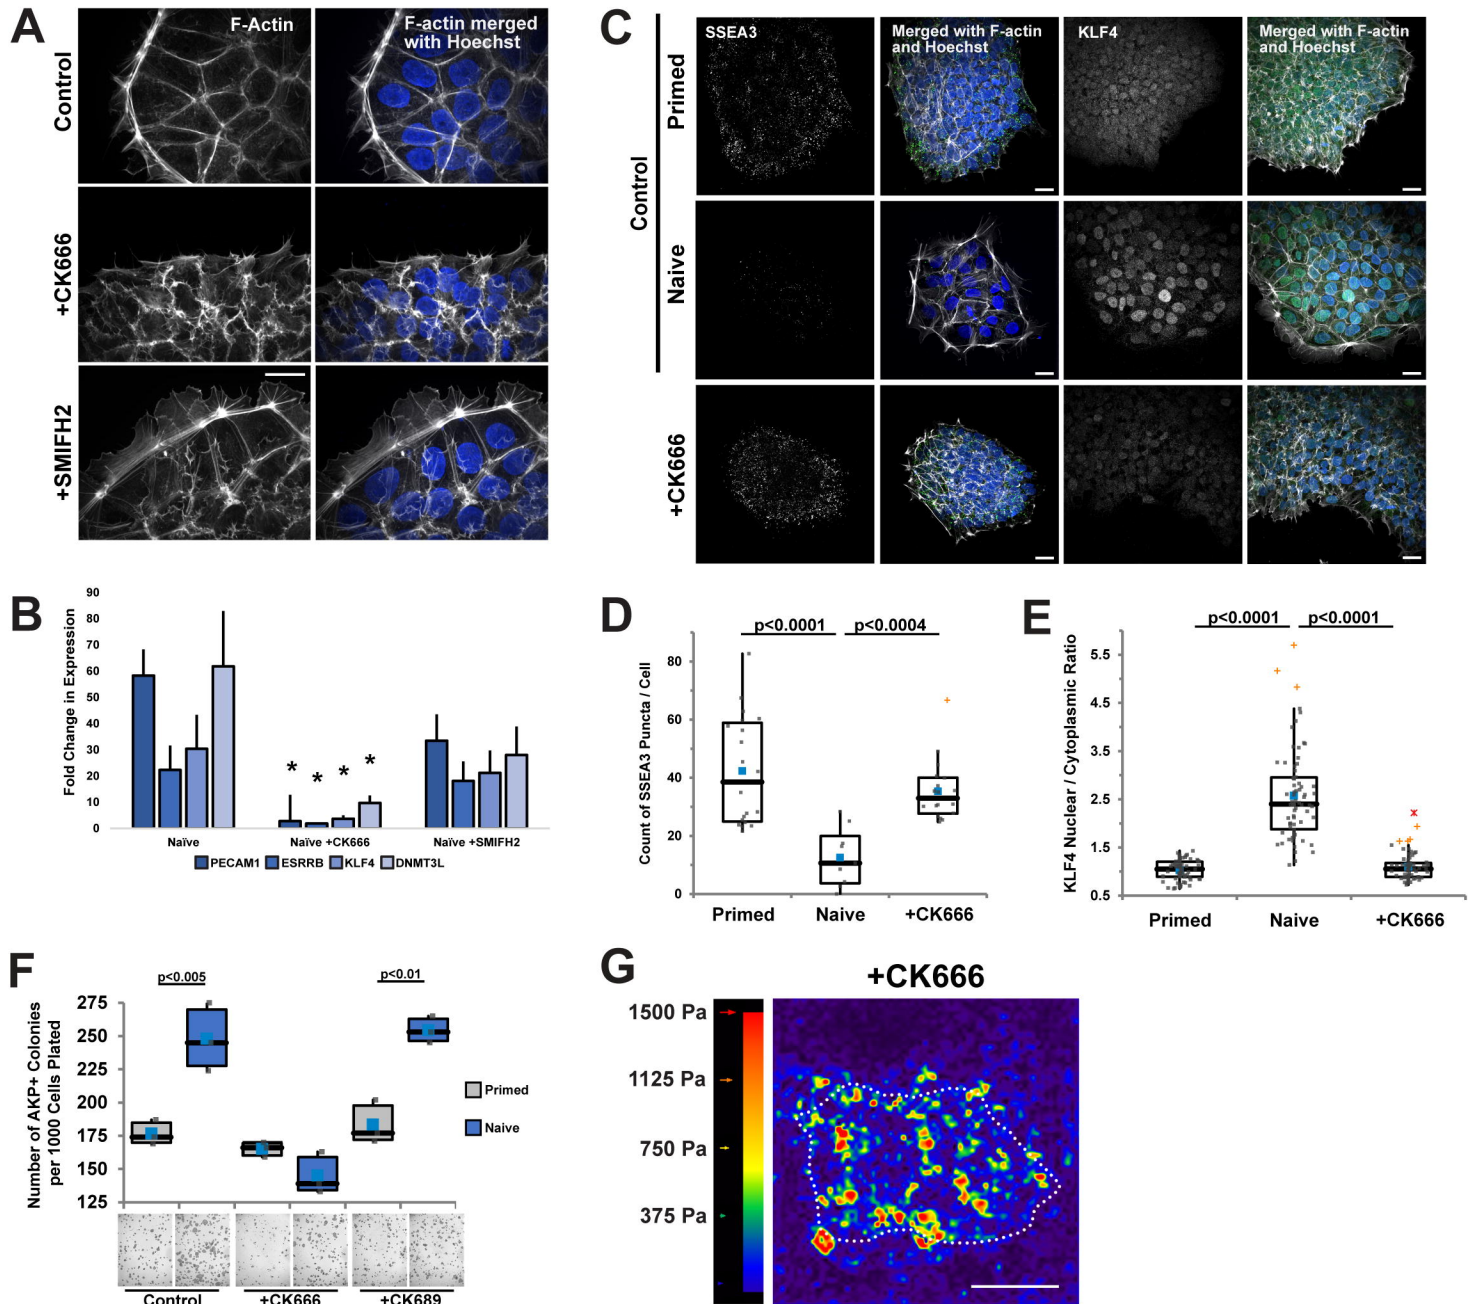



## Figure 3. Meyer et al.

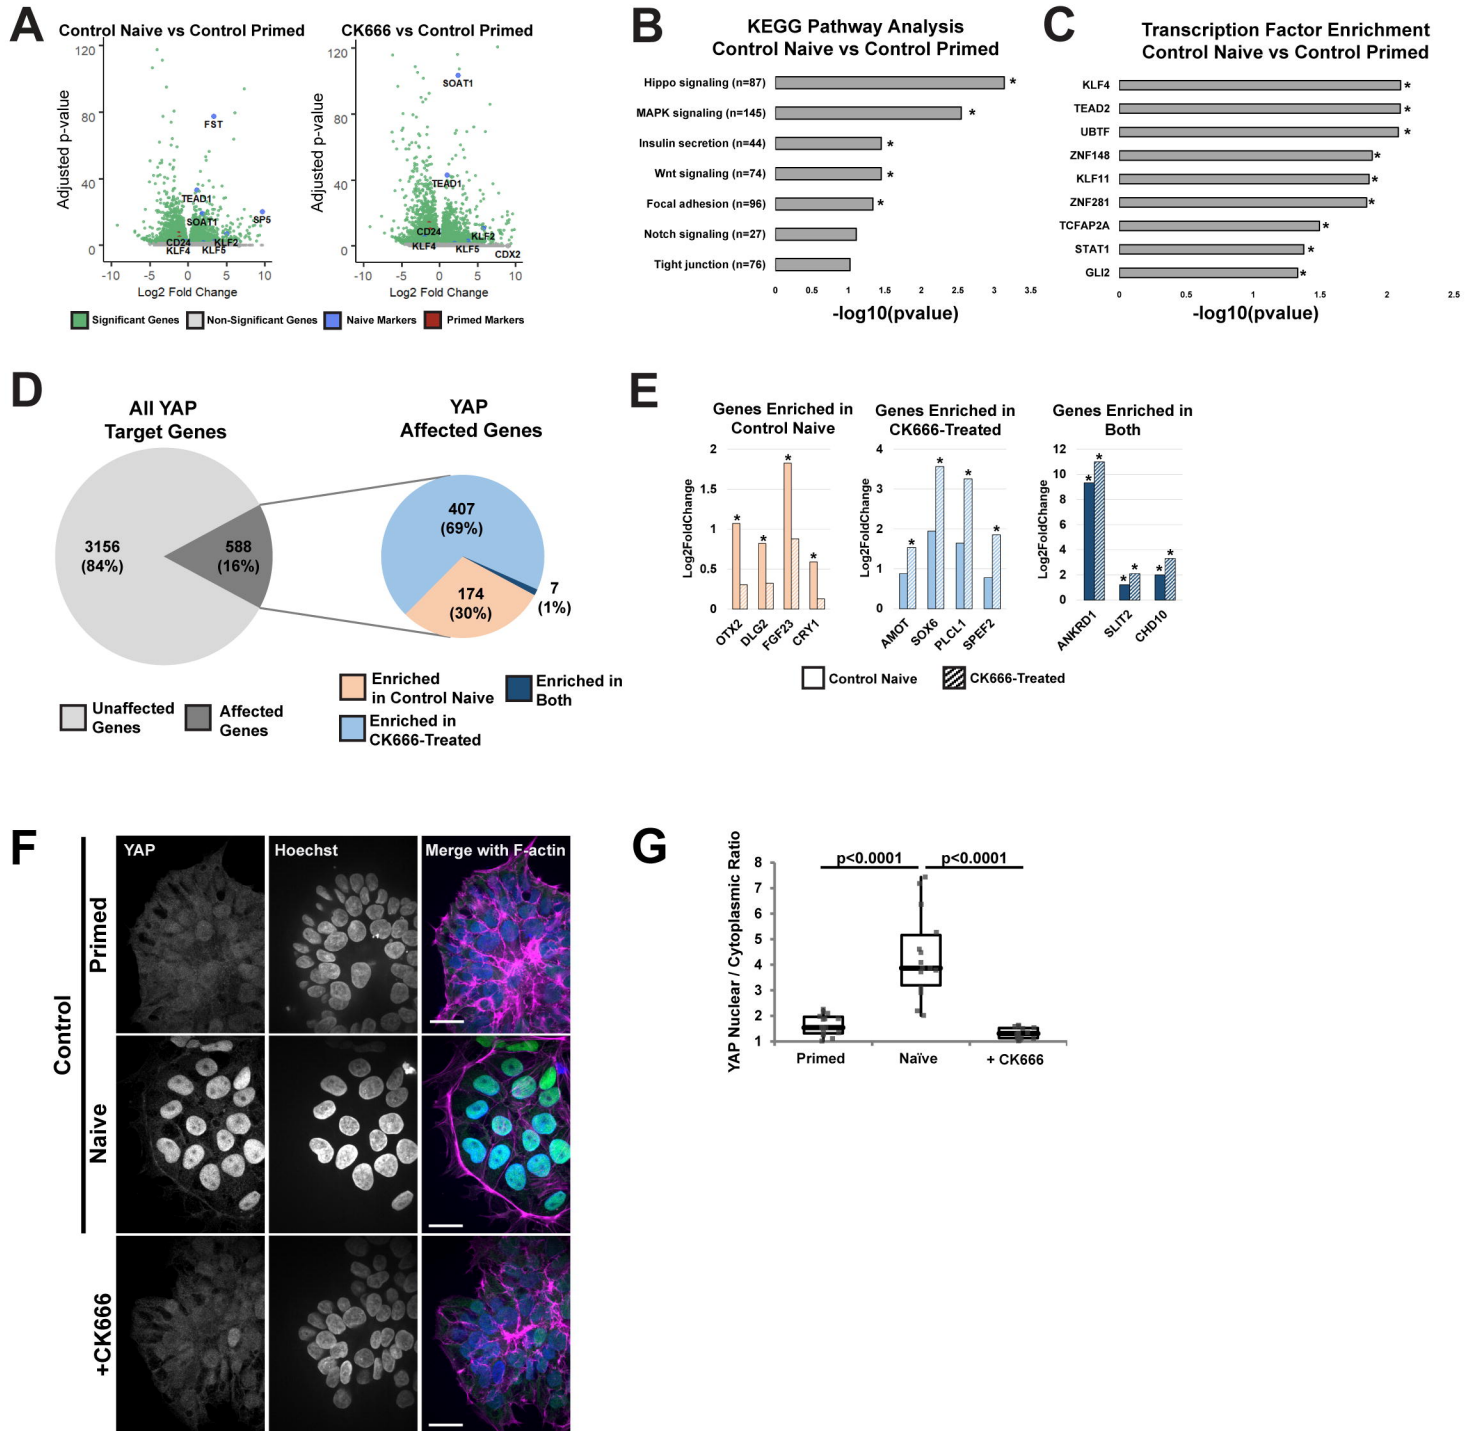

## Figure 4. Meyer et al.

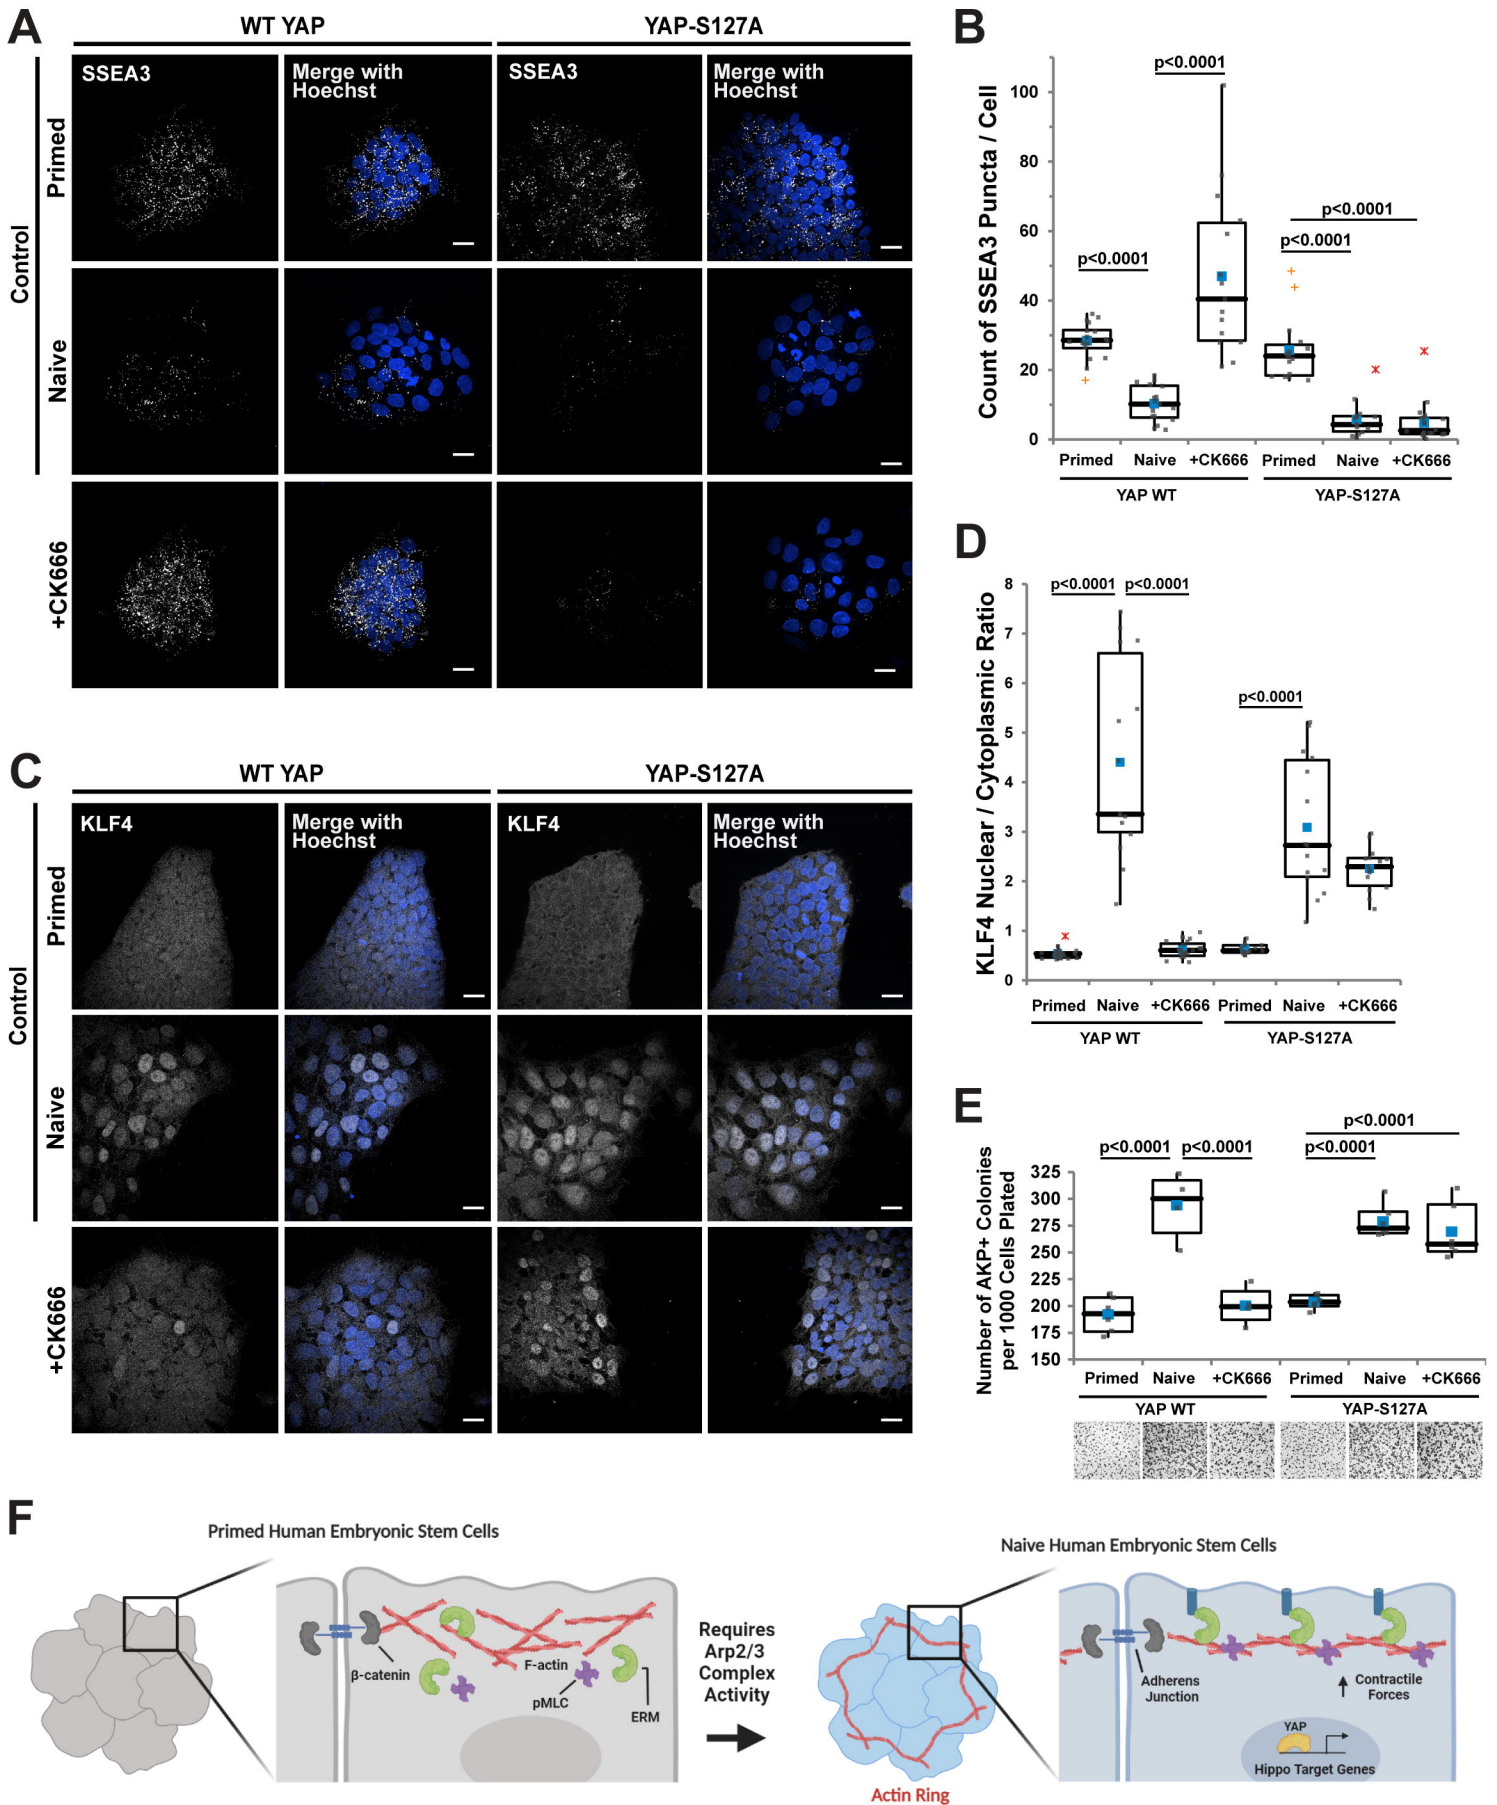

Source: https://www.biorxiv.org/content/10.1101/2023.01.16.524285v1.full.pdf
